# Supplementary material for: Antimicrobial peptide-functionalized polyhydroxyalkanoate bio-beads as a bactericidal material for water disinfection
Source: Royal Society of Chemistry journal article supplement (doi:10.1039/d3ew00396e), 2023-01-01
Supplement: d3ew00396e2.pdf [file d3ew00396e2.pdf]

## Supplementary material

### **Antimicrobial Peptide Functionalized Polyhydroxyalkanoate Bio-beads as A Bactericidal Material for Water Disinfection**

Ying Wu<sup>1</sup>, Baotong Zhu<sup>1</sup>, Na Wei<sup>2</sup>, \*

<sup>1</sup>Department of Civil and Environmental Engineering and Earth Sciences, University of Notre Dame, 156 Fitzpatrick Hall, Notre Dame, Indiana 46556, United States

<sup>2</sup>Department of Civil and Environmental Engineering, University of Illinois Urbana-Champaign, 3215 Newmark Civil Engineering Bldg, Urbana, Illinois 61801, United States.

\*Corresponding Author: Na Wei, E-mail: [nawei2@illinois.edu](mailto:nawei2@illinois.edu).

Number of pages: 10

Number of Tables: 2

Number of Figures: 6

**Table S1.** Plasmids and primers used in this study.

| <b>Plasmids and primers</b> | <b>Description</b>                                                                                 | <b>Reference</b> |
|-----------------------------|----------------------------------------------------------------------------------------------------|------------------|
| <b>Plasmids</b>             |                                                                                                    |                  |
| pET23b(+)                   | Bacterial vector for protein expression                                                            | 1                |
| pBBR1MCS-2                  | Bacterial vector for cloning and protein expression                                                | 2                |
| pET23b-HHC10-phaC           | <i>HHC10-phaC</i> expressed in pET23b(+)                                                           | This study       |
| pET23b-HA-HHC10-phaC        | HA tagged <i>HHC10-phaC</i> expressed in pET23b(+)                                                 | This study       |
| pBBR-phaAB                  | <i>phaA</i> and <i>phaB</i> expressed in pBBR1MCS-2-kan                                            | This study       |
| <b>Primers</b>              |                                                                                                    |                  |
| NdeI_HHC10_G4S_phaC_F       | gggcatatgaaacgctggtggaaatggattcgtggggggggggagggaagtgc<br>gaccggcaaaggc                             |                  |
| NdeI-HA-HHC10_PhaC_F        | gggcatatgtaccatacgcaggtccagactacgctaaacgctggtggaaatgga<br>ttcgtggctggtgccgcgaggcagcgcgaccggcaaaggc |                  |
| phaC_BamHI_R                | cccggatcctcatgccttgctttgacg                                                                        |                  |
| phaAB_XhoI_F                | gggctcgagaaggagatataccatgactgacgtgtcatcgtatc                                                       |                  |
| phaAB_BamHI_R               | cccggatcctcagcccatatgcaggc                                                                         |                  |

**Table S2.** Characteristics of the surface water samples from South Bend, Indiana.

| <b>Surface Water</b>          |           |           |
|-------------------------------|-----------|-----------|
| <b>Parameters (mg/L)</b>      | <b>SM</b> | <b>SJ</b> |
| Ionic strength (M)            | 0.010     | 0.013     |
| pH                            | 8.75      | 8.60      |
| Na <sup>+</sup>               | 143.65    | 192.58    |
| Ca <sup>2+</sup>              | 33.2      | 37.05     |
| Mg <sup>+</sup>               | 21.56     | 26.23     |
| K <sup>+</sup>                | 4.78      | 5         |
| Cu <sup>2+</sup>              | 0.0067    | 0.049     |
| Fe <sup>3+</sup>              | ND        | 0.0057    |
| Zn <sup>2+</sup>              | ND        | 0.00068   |
| F <sup>-</sup>                | 0.11      | 0.11      |
| Cl <sup>-</sup>               | 180.53    | 221.36    |
| NO <sub>2</sub> <sup>-</sup>  | 0.59      | ND        |
| Br <sup>-</sup>               | 2.21      | 2.2       |
| NO <sub>3</sub> <sup>-</sup>  | 1.27      | 1.63      |
| PO <sub>4</sub> <sup>3-</sup> | ND        | ND        |
| SO <sub>4</sub> <sup>2-</sup> | 44.61     | 60.09     |

Abbreviations: ND, not detected; SM, St. Mary's Lake; SJ, St. Joseph's Lake.

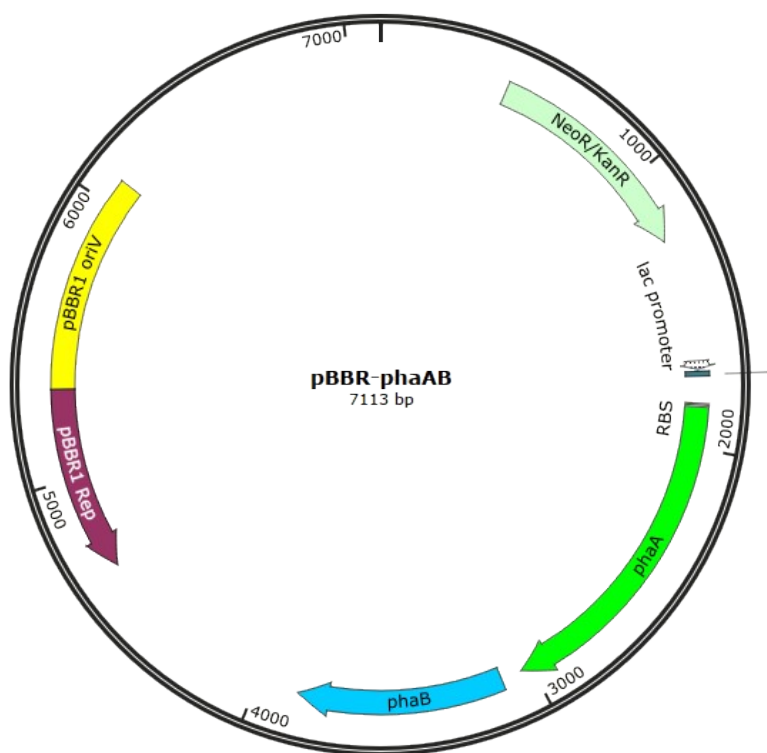

**Figure S1.** The plasmid map of pBBR-phaAB.

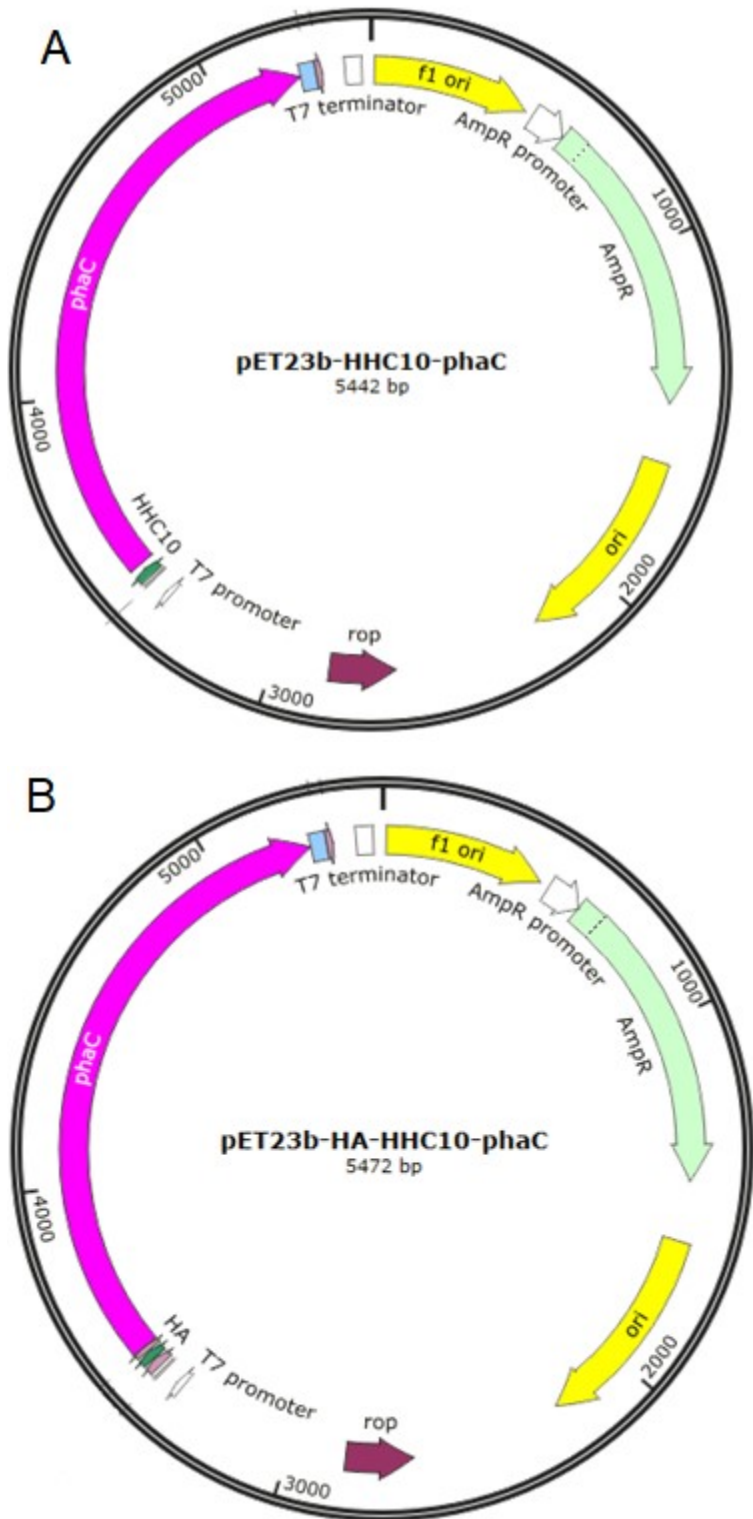

**Figure S2.** The plasmid map of p23b-HHC10-phaC (A) and p23b-HA-HHC10-phaC (B).

A

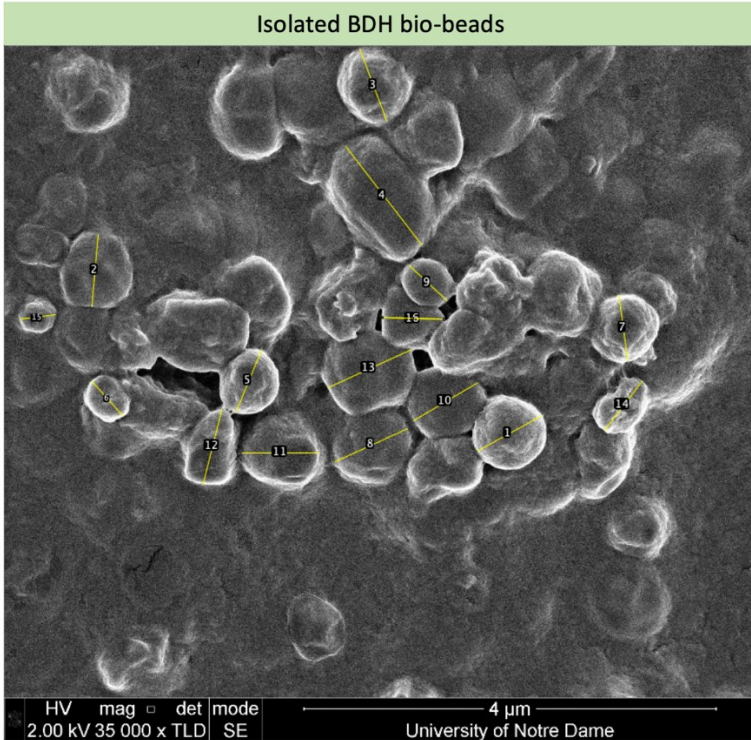

| BDH number | Length (nm) |
|------------|-------------|
| 1          | 700         |
| 2          | 698         |
| 3          | 742         |
| 4          | 1206        |
| 5          | 630         |
| 6          | 454         |
| 7          | 633         |
| 8          | 765         |
| 9          | 507         |
| 10         | 719         |
| 11         | 745         |
| 12         | 744         |
| 13         | 880         |
| 14         | 596         |
| 15         | 333         |
| 16         | 592         |

B

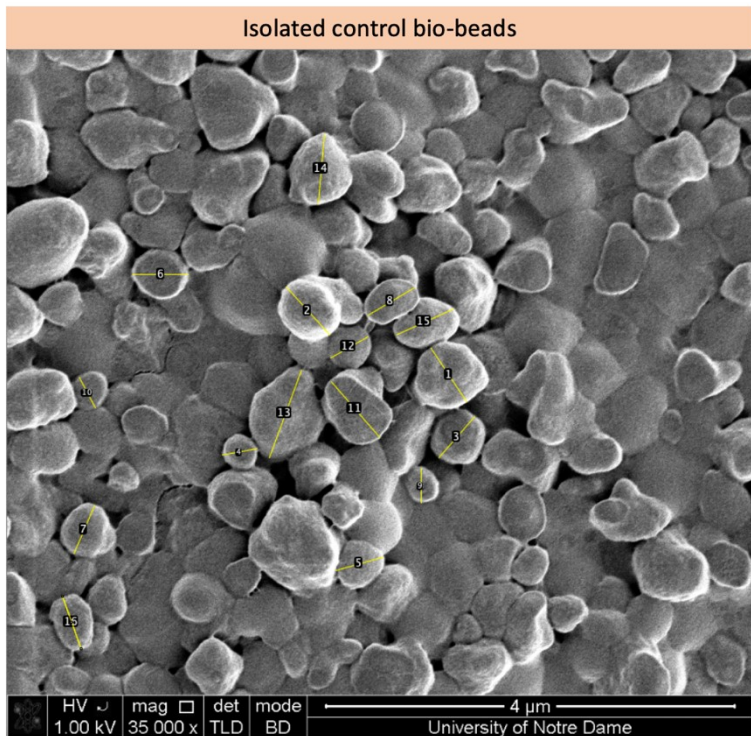

| Control bio-beads Number | Length (nm) |
|--------------------------|-------------|
| 1                        | 621         |
| 2                        | 629         |
| 3                        | 529         |
| 4                        | 339         |
| 5                        | 474         |
| 6                        | 547         |
| 7                        | 503         |
| 8                        | 529         |
| 9                        | 341         |
| 10                       | 331         |
| 11                       | 715         |
| 12                       | 427         |
| 13                       | 908         |
| 14                       | 671         |
| 15                       | 611         |
| 16                       | 535         |

Figure S3. Approximated size of isolated BDH (A) and control bio-beads (B) in the SEM images analyzed by Fiji image software.

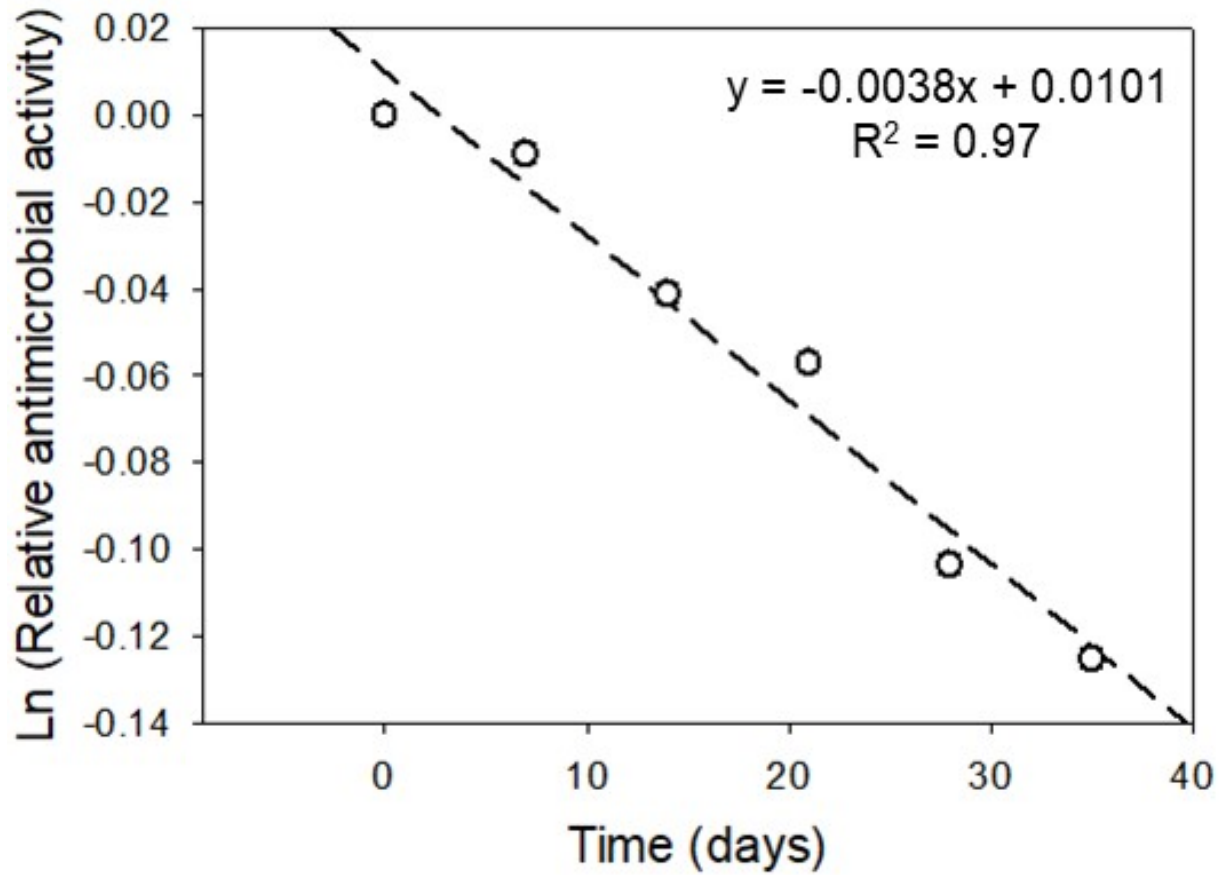

Fi

Figure S4. The natural logarithm of BDH antimicrobial activity versus time with the fitted regression line. It demonstrates the decay of BDH antimicrobial activity fits the first-order reaction.

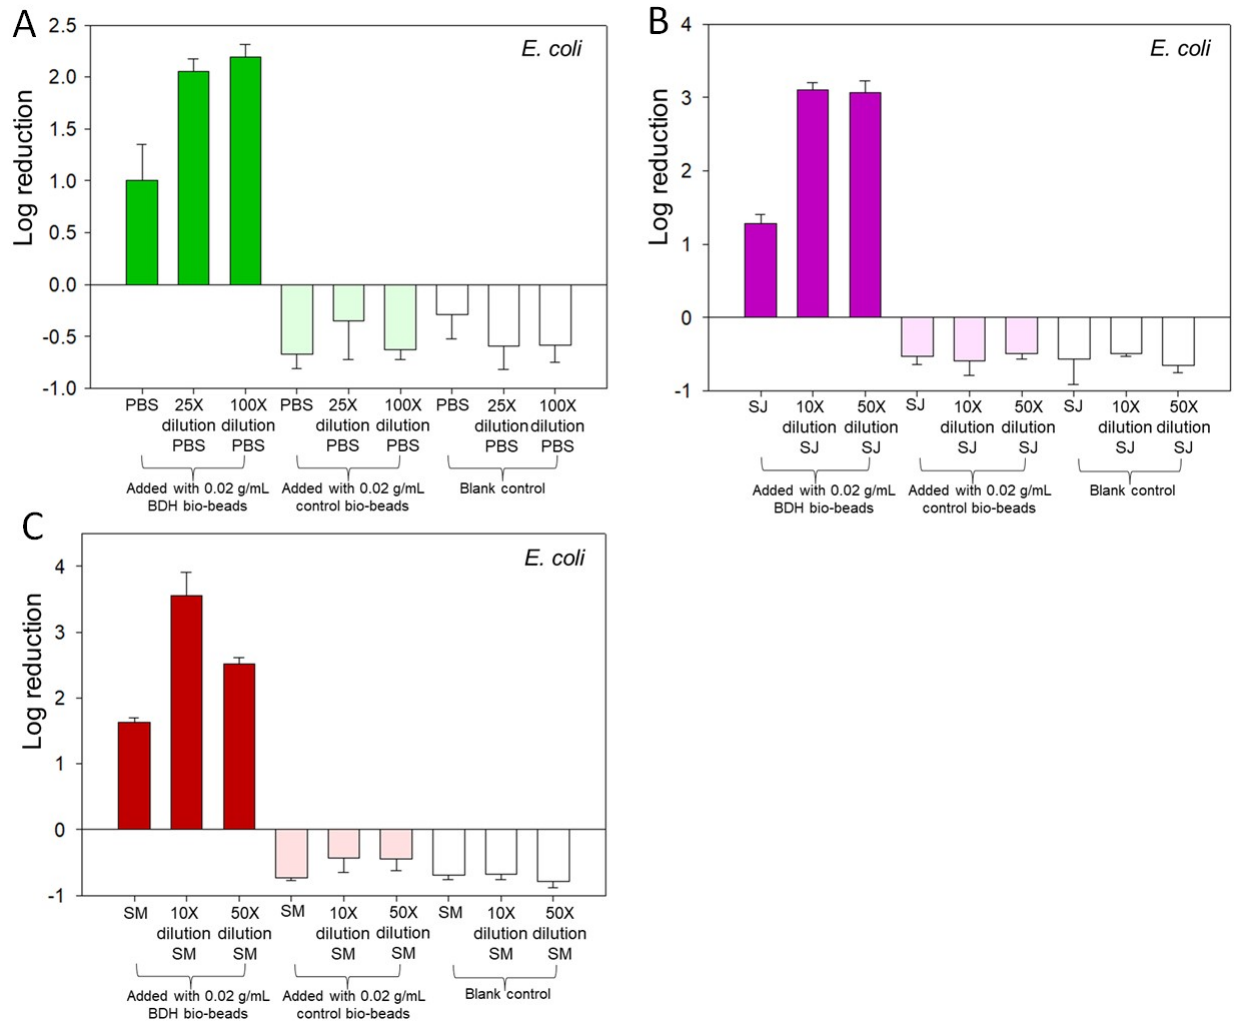

**Figure S5.** Log reductions of *E. coli* by the BDH, control microbeads, and blank control in PBS buffer (A), surface waters SJ (B), SM (C), and their diluted solutions. Results are the means of triplicate experiments; error bars indicating standard deviations. Abbreviations: SM, St. Mary's Lake; SJ, St. Joseph's Lake.



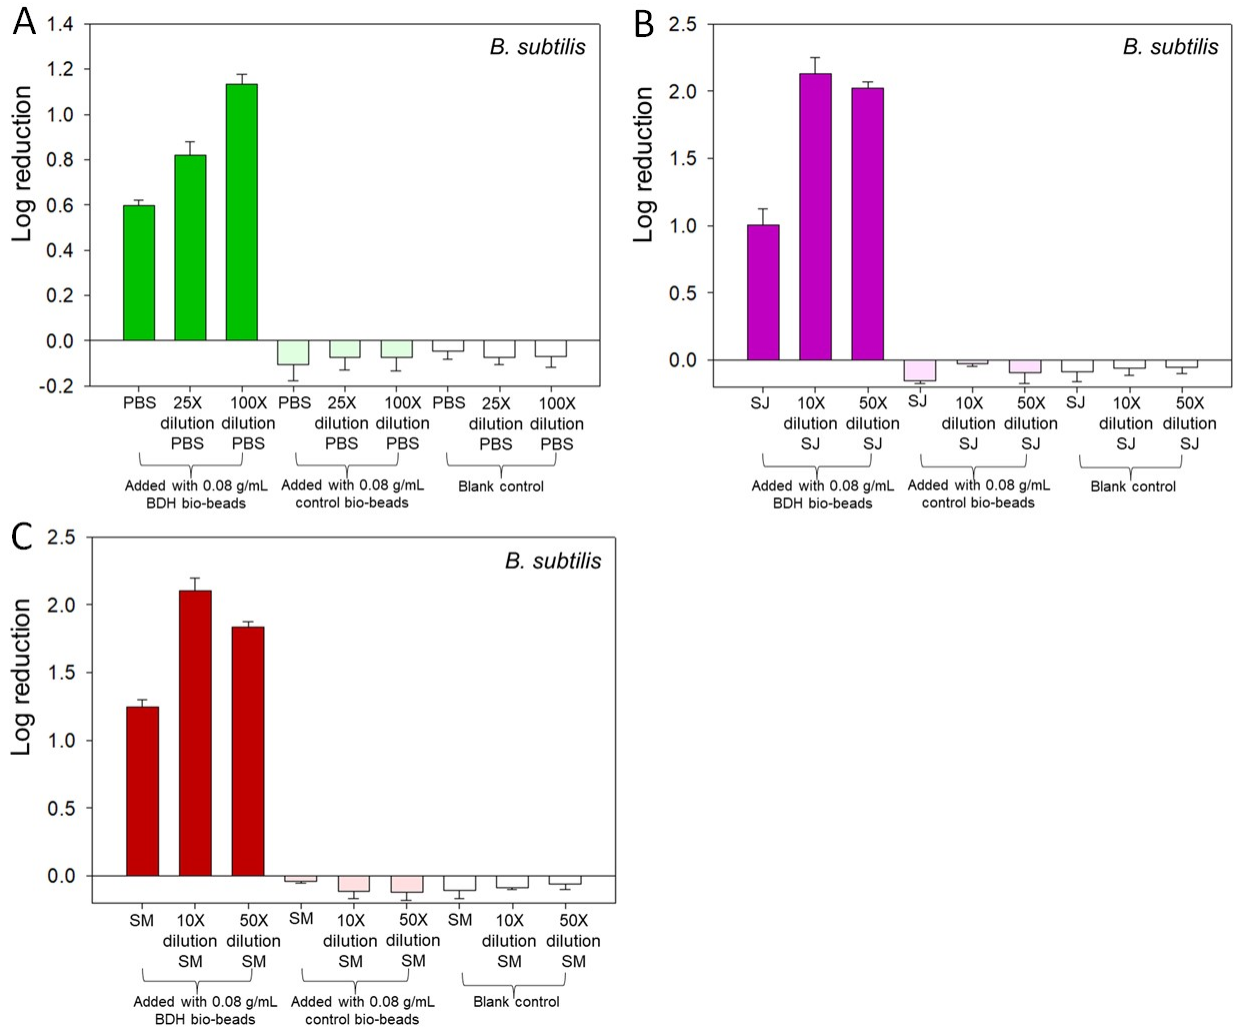

**Figure S6.** Log reductions of *B. subtilis* by the BDH, control microbeads, and blank control in PBS buffer (A), surface waters SJ (B), SM (C), and their diluted solutions. Results are the means of triplicate experiments; error bars indicating standard deviations. Abbreviations: SM, St. Mary’s Lake; SJ, St. Joseph’s Lake.

## References

1. Edner, C.; Li, J.; Albrecht, T.; Mahlow, S.; Hejazi, M.; Hussain, H.; Kaplan, F.; Guy, C.; Smith, S. M.; Steup, M. Glucan, water dikinase activity stimulates breakdown of starch granules by plastidial  $\beta$ -amylases. *Plant Physiol.* **2007**, *145* (1), 17-28.
2. Kovach, M. E.; Elzer, P. H.; Hill, D. S.; Robertson, G. T.; Farris, M. A.; Roop II, R. M.; Peterson, K. M. Four new derivatives of the broad-host-range cloning vector pBBR1MCS, carrying different antibiotic-resistance cassettes. *Gene* **1995**, *166* (1), 175-176.
